# Supplementary material
Source: PubMed Central journal article supplement (PMC4841000)
Supplement: Supp_Figure1.pdf [file Supp_Figure1.pdf]

## Supplementary Data

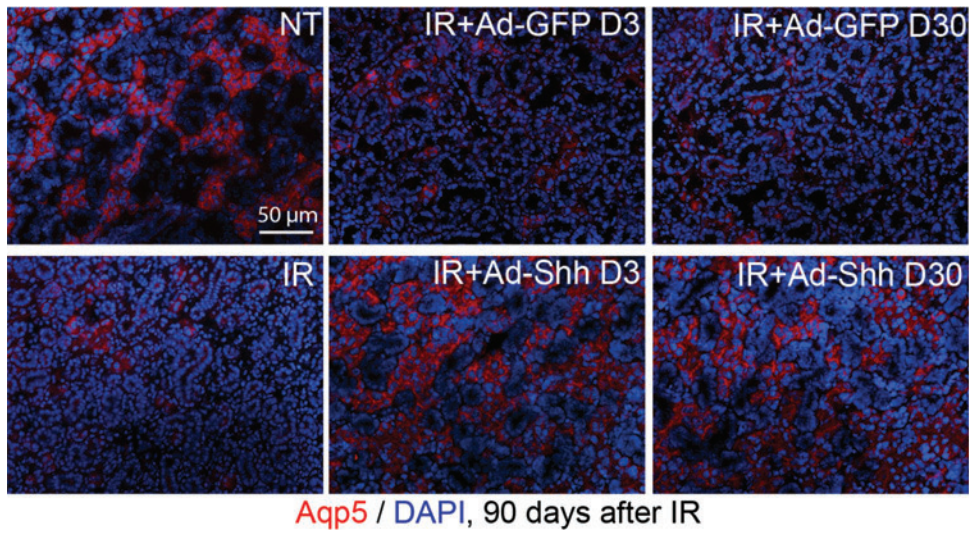

**Supplementary Fig. S1.** Representative immunofluorescence staining of the acinar marker Aqp5 in male SMGs.

---
