# Supplementary material
Source: PubMed Central journal article supplement (PMC4841000)
Supplement: Supp_Figure2.pdf [file Supp_Figure2.pdf]

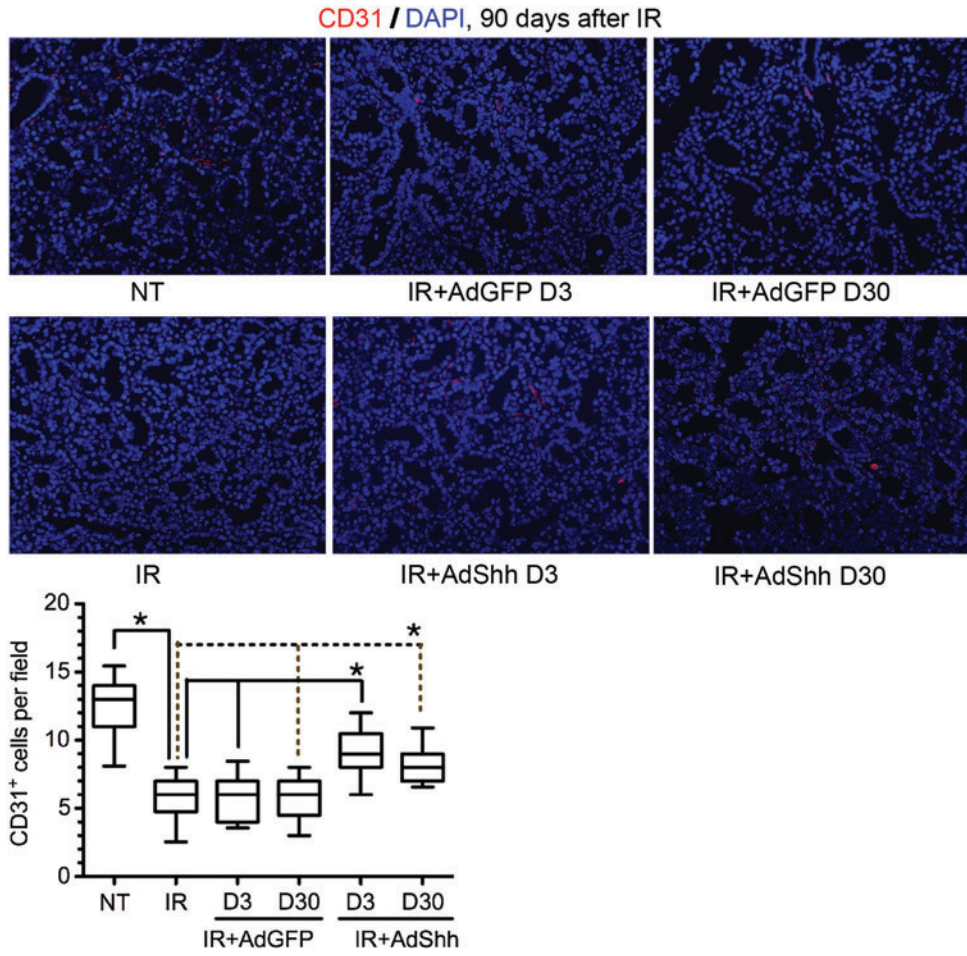

**Supplementary Fig. S2.** Representative immunofluorescence staining of the endothelial marker CD31 in male SMGs and quantification of CD31<sup>+</sup> cells per field.
